# Supplementary material for: Prognostic Value of Inflammatory and Nutritional Biomarkers of Immune Checkpoint Inhibitor Treatment for Recurrent or Metastatic Squamous Cell Carcinoma of the Head and Neck
Source: Cancers (Basel). 2023 Mar 28;15(7):2021. doi: 10.3390/cancers15072021 (PMC10093403; doi:10.3390/cancers15072021)
Supplement: Supplementary file 1 [file cancers-15-02021-s001.zip › cancers-2287638-supplementary.pdf]

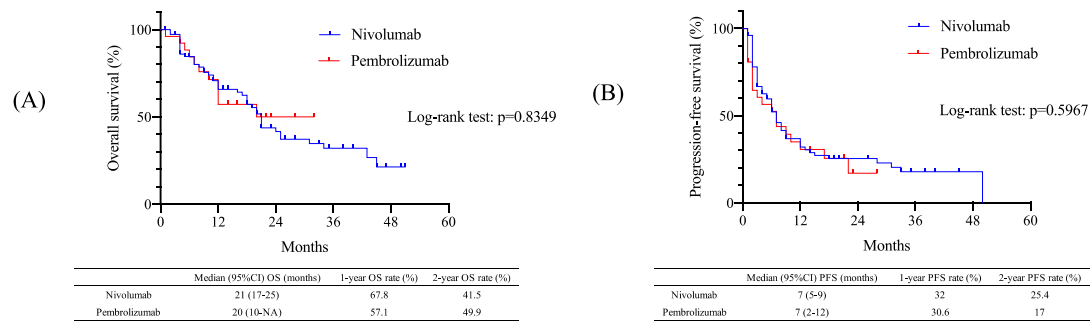

**Figure S1.** Kaplan–Meier curves of overall survival (A) and progression-free survival (B) according to the immune checkpoint inhibitors. Significant differences in OS and PFS were observed between Nivolumab and Pembrolizumab.
